# Supplementary material for: Pain and small fiber pathology in men with fibromyalgia syndrome
Source: PubMed Central journal article supplement (PMC11543218; doi:10.1097/pr9.0000000000001212), 2024-11-06
Supplement: painreports-9-e1212-s001.pdf [file painreports-9-e1212-s001.pdf]

**Supplementary Table 1.** Clinical data, results of questionnaire assessment, and small fiber tests in men with FMS with normal and impaired glucose tolerance.

|                                  | <b>Normal glucose tolerance<br/>(n = 32)</b> | <b>Impaired glucose tolerance<br/>(n = 10)</b> |
|----------------------------------|----------------------------------------------|------------------------------------------------|
| Age (years)                      | 55 (33 – 75)                                 | 61 (31 – 74)                                   |
| BMI (kg/m <sup>2</sup> )         | 28.9 (21.3 – 40.6)                           | 30.1 (23.0 – 45.6)                             |
| Pain duration (years)            | 10 (2 – 60)                                  | 20 (4 – 50)                                    |
| Current pain intensity on<br>NRS | 5 (1 – 8)                                    | 5 (2 – 8)                                      |
| NPSI sum score                   | 3.7 (0 – 7.4)                                | 2.6 (0 – 8.0)                                  |
| NPSI discriminative score        | 66.7 (42.4 – 84.3)                           | 54.5 (42.0 – 79.6)                             |
| GCPS                             |                                              |                                                |
| – Pain intensity                 | 65 (37 – 93)                                 | 62 (42 – 83)                                   |
| – Disability due to pain         | 49 (0 – 83)                                  | 62 (8 – 80)                                    |
| PCS sum score                    | 20 (2 – 41)                                  | 24 (2 – 42)                                    |
| ADS sum score                    | 18 (7 – 39)                                  | 24 (8 – 48)                                    |
| FIQ sum score                    | 45 (27 – 67)                                 | 48 (24 – 66)                                   |
| STAI-S                           | 43 (32 – 73)                                 | 38 (30 – 48)*                                  |
| STAI-T                           | 43 (31 – 73)                                 | 42 (34 – 55)                                   |
| MPSS Gerbershagen Grad           | 3 (2 – 3)                                    | 3 (3 – 3)                                      |
| WPI                              | 13.5 (8 – 19)                                | 13.5 (8 – 18)                                  |
| SSS                              | 8 (3 – 11)                                   | 6.5 (5 – 12)                                   |
| <b>Small fiber tests</b>         |                                              |                                                |
| IENFD (fibers/mm)                |                                              |                                                |
| – distal                         | 4.3 (1.0 – 8.3)                              | 4.2 (1.6 – 14.4)                               |

|                             |                      |                      |
|-----------------------------|----------------------|----------------------|
| – proximal                  | 7.6 (0.6 – 15.5)     | 6.4 (2.5 – 16.0)     |
| <b>IENFD subgroups</b>      |                      |                      |
| – Normal IENFD              | 6/32 (19%)           | 1/10 (10%)           |
| – Proximally reduced        | 1/32 (3%)            | 1/10 (10%)           |
| – Distally reduced          | 9/32 (28%)           | 2/10 (20%)           |
| – Generalized reduction     | 16/32 (50%)          | 6/10 (60%)           |
| <b>CCM</b>                  |                      |                      |
| – NFD (no/mm <sup>2</sup> ) | 22.4 (4.2 – 35.4)    | 19.8 (5.2 – 33.3)    |
| – NBD (no/mm <sup>2</sup> ) | 56.8 (19.8 – 114.6)  | 63.5 (13.5 – 140.8)  |
| – NFL (mm/mm <sup>2</sup> ) | 12.8 (5.0 – 18.4)    | 12.4 (4.8 – 18.3)    |
| <b>QST</b>                  |                      |                      |
| – CDT                       | -0.29 (-2.26 – 1.32) | -0.11 (-1.54 – 0.78) |
| – WDT                       | -0.81 (-1.75 – 1.29) | -0.87 (-1.52 – 0.50) |
| – TSL                       | -0.43 (-1.65 – 1.32) | -0.33 (-1.3 – 0.60)  |
| – PHS                       | -0.67 (-2.98 – 0.48) | -1.83 (-2.98 – 0.48) |
| – CPT                       | -0.49 (-0.56 – 3.24) | 0.88 (-0.56 – 2.88)  |
| – HPT                       | -0.41 (-0.97 – 1.64) | -0.24 (-0.97 – 2.92) |
| – MDT                       | -0.47 (-2.47 – 1.26) | 0.38 (-1.18 – 1.26)* |
| – MPT                       | -0.57 (-2.07 – 1.09) | -0.33 (-1.91 – 1.09) |
| – MPS                       | 0.47 (-1.46 – 2.61)  | 0.58 (-0.82 – 2.46)  |
| – VDT                       | 0.18 (-2.27 – 1.14)  | 0.26 (-2.55 – 1.14)  |
| – PPT                       | 0.48 (-2.16 – 2.61)  | 0.13 (-0.71 – 1.49)  |
| <b>Pleasant touch</b>       | 8 (0 – 10)           | 7 (-5 – 10)          |

Data are given as median with range in brackets. \*p<0.05.

**Abbreviations:** ADS = Allgemeine Depressionsskala; CCM = corneal confocal microscopy; FIQ = Fibromyalgia Impact Questionnaire; CDT = cold detection threshold; CPT = cold pain threshold; GCPS = Graded Chronic Pain Scale; HPT = heat pain threshold; IENFD = intraepidermal nerve fiber density; MDT = mechanical detection threshold; MPS = mechanical pain sensitivity; MPT= mechanical pain threshold; NBD = nerve branching density; NFD = nerve fiber density; NFL = nerve fiber length; NPSI = Neuropathic Pain Symptom Inventory; PCS = Pain Catastrophizing Scale; PHS = paradoxical heat sensation; PPT = pressure pain threshold; QST = Quantitative Sensory Testing; SSS = symptom severity score; STAI = State-Trait Anxiety Inventory; TSL = thermal sensory limen; VDT = vibration detection threshold; WDT = warm detection threshold; WPI = widespread pain index.

**Supplementary Table 2.** Laboratory normative values for intraepidermal nerve fiber density

(normative values are not age-adjusted).

|                            |          |
|----------------------------|----------|
| Distal IENFD (fibers/mm)   | 9 +/- 3  |
| Proximal IENFD (fibers/mm) | 12 +/- 4 |

Data are given as median with range in brackets.

**Abbreviations:** IENFD = intraepidermal nerve fiber density.

**Supplementary Table 3.** Correlation of cutaneous and corneal innervation with age, BMI, and pain duration in men with FMS and male healthy controls.

| <b>FMS</b>              |                   |                   |                      |
|-------------------------|-------------------|-------------------|----------------------|
|                         | <b>Age</b>        | <b>BMI</b>        | <b>Pain duration</b> |
| IENFD distal (n = 42)   | -0.045, p = 0.779 | -0.217, p = 0.168 | -0.172, p = 0.275    |
| IENFD proximal (n = 42) | -0.042, p = 0.790 | -0.125, p = 0.429 | -0.179, p = 0.256    |
| NFD (n = 41)            | -0.108, p = 0.501 | -0.133, p = 0.409 | 0.004, p = 0.979     |
| NBD (n = 41)            | -0.173, p = 0.278 | 0.196, p = 0.219  | -0.228, p = 0.151    |
| NFL (n = 41)            | -0.227, p = 0.153 | -0.163, p = 0.308 | -0.162, p = 0.312    |
| <b>Healthy controls</b> |                   |                   |                      |
|                         | <b>Age</b>        |                   |                      |
| IENFD distal (n = 55)   | -0.244, p = 0.073 |                   |                      |
| IENFD proximal (n = 40) | -0.233, p = 0.148 |                   |                      |
| NFD (n = 28)            | -0.276, p = 0.155 |                   |                      |
| NBD (n = 28)            | -0.086, p = 0.664 |                   |                      |
| NFL (n = 28)            | -0.130, p = 0.511 |                   |                      |

The bivariate Spearman correlation was performed for correlation analysis.

**Abbreviations:** BMI = Body mass index; FMS = fibromyalgia syndrome; IENFD = intraepidermal nerve fiber density; NBD = nerve branch density; NFD = nerve fiber density; NFL = nerve fiber length.

**Supplementary Table 4.** Results of questionnaire assessment and small fiber tests in the FMS subgroups classified according to the skin innervation pattern.

|                              | <b>Normal IENFD<br/>(n = 7)</b> | <b>Proximally reduced<br/>IENFD (n = 2)</b> | <b>Distally reduced<br/>IENFD (n = 11)</b> | <b>Generalized reduction<br/>of IENFD (n = 22)</b> | <b>Pathological IENFD<br/>(n=35)</b> |
|------------------------------|---------------------------------|---------------------------------------------|--------------------------------------------|----------------------------------------------------|--------------------------------------|
| NPSI sum score               | 3.3 (0 – 6.4)                   | 5.4 (2.7 – 8.0)                             | 3.7 (1.1 – 5.9)                            | 3.7 (1.6 – 7.4)                                    | 3.7 (1.1 – 8.0)                      |
| NPSI discriminative<br>score | 59.5 (42.0 – 71.3)              | 74.6 (74.4 – 74.7)                          | 62.7 (44.8 – 77.3)                         | 66.5 (44.9 – 84.3)                                 | 66.5 (44.8 – 84.3)                   |
| <b>GCPS</b>                  |                                 |                                             |                                            |                                                    |                                      |
| – Pain intensity             | 57 (42 – 93)                    | 72 (60 – 83)                                | 67 (50 – 80)                               | 62 (37 – 90)                                       | 63 (37 – 90)                         |
| – Disability due to<br>pain  | 40 (7 – 83)                     | 63 (50 – 77)                                | 47 (0 – 73)                                | 59 (2 – 83)                                        | 53 (0 – 83)                          |
| PCS sum sore                 | 26 (11 – 41)                    | 4 (2 – 6)                                   | 20 (3- 38)                                 | 22 (2 – 42)                                        | 20 (2 – 42)                          |
| ADS sum sore                 | 15 (11 – 39)                    | 20 (7 – 33)                                 | 18 (8 – 38)                                | 24 (8 – 48)                                        | 21 (7 – 48)                          |
| FIQ sum score                | 34 (28 – 58)                    | 39 (29 – 48)                                | 38 (27 – 67)                               | 48 (24 – 66)                                       | 46 (24 – 67)                         |
| STAI-S                       | 38 (37 – 63)                    | 41 (39 – 43)                                | 41 (32 – 73)                               | 43 (30 – 51)                                       | 41 (30 – 73)                         |
| STAI-T                       | 41 (36 – 59)                    | 38 (37 – 39)                                | 44 (33 – 73)                               | 44 (31 – 55)                                       | 43 (31 – 73)                         |

|                             |                      |                    |                      |                      |                      |
|-----------------------------|----------------------|--------------------|----------------------|----------------------|----------------------|
| MPSS Gerbershagen           | 3 (2 – 3)            | 3 (3 – 3)          | 3 (2 – 3)            | 3 (3 – 3)            | 3 (2 – 3)            |
| Grad                        |                      |                    |                      |                      |                      |
| WPI                         | 10 (8 – 16)          | 13.5 (13 – 14)     | 15 (12 – 17)         | 13.5 (8 – 19)        | 14 (8 – 19)          |
| SSS                         | 8 (5 – 10)           | 6.5 (5 – 8)        | 7 (4 – 12)           | 8 (3 – 11)           | 8 (3 – 12)           |
| <b>Small fiber tests</b>    |                      |                    |                      |                      |                      |
| IENFD (fibers/mm)           |                      |                    |                      |                      |                      |
| – distal                    | 7.3 (6.7 – 14.4)     | 7.4 (6.5 – 8.3)    | 4.1 (1.9 – 5.9)      | 3.4 (1.0 – 5.9)      | 4.0 (1.0 – 8.3)      |
| – proximal                  | 12.0 (8.2 – 16.0)    | 3.4 (2.5 – 4.3)    | 9.8 (8.1 – 13.2)     | 6.1 (0.6 – 7.7)      | 6.7 (0.6 – 13.2)     |
| CCM                         |                      |                    |                      |                      |                      |
| – NFD (no/mm <sup>2</sup> ) | 22.9 (4.2 – 27.1)    | 29.2 (29.2 – 29.2) | 22.9 (16.7 – 33.3)   | 19.3 (5.2 – 35.4)    | 21.4 (5.2 – 35.4)    |
| – NBD (no/mm <sup>2</sup> ) | 66.4 (28.1 – 104.2)  | 50.0 (50.0 – 50.0) | 80.2 (21.9 – 140.8)  | 52.6 (13.5 – 101.6)  | 57.8 (13.5 – 140.8)  |
| – NFL (mm/mm <sup>2</sup> ) | 14.2 (5.0 – 15.6)    | 14.0 (14.0 – 14.0) | 14.1 (8.4 – 18.4)    | 10.9 (4.8 – 17.1)    | 12.4 (4.8 – 18.4)    |
| QST                         |                      |                    |                      |                      |                      |
| – CDT                       | -0.46 (-2.26 – 0.67) | 0.11 (-0.59 – 0.8) | -0.04 (-1.89 – 1.32) | -0.28 (-2.26 – 1.27) | -0.26 (-2.26 – 1.32) |
| – WDT                       | -0.49 (-1.75 – 0.37) | 0.35 (0.19 – 0.5)  | -1.13 (-1.4 – 0.74)  | -0.86 (-1.73 – 1.29) | -0.88 (-1.73 – 1.29) |
| – TSL                       | -0.17 (-1.5 – 0.6)   | 0.31 (0.23 – 0.38) | -0.51 (-1.65 – 0.89) | -0.43 (-1.62 – 1.32) | -0.44 (-1.65 – 1.32) |

|                |                      |                      |                      |                      |                      |
|----------------|----------------------|----------------------|----------------------|----------------------|----------------------|
| – PHS          | -0.67 (-2.98 – 0.48) | -0.10 (-0.67 – 0.48) | -2.98 (-2.98 – 0.48) | -0.10 (-2.98 – 0.48) | -0.67 (-2.98 – 0.48) |
| – CPT          | 0.23 (-0.56 – 2.96)  | 0.69 (-0.56 – 1.94)  | -0.41 (-0.56 – 2.98) | -0.14 (-0.56 – 3.24) | -0.41 (-0.56 – 3.24) |
| – HPT          | 0.26 (-0.88 – 1.64)  | 0.98 (-0.97 – 2.92)  | -0.43 (-0.97 – 0.73) | -0.45 (-0.97 – 1.39) | -0.43 (-0.97 – 2.92) |
| – MDT          | 0.1 (-1.65 – 0.77)   | 0.64 (0.05 – 1.22)   | -0.47 (-1.54 – 1.26) | -0.44 (-2.47 – 1.26) | -0.26 (-2.47 – 1.26) |
| – MPT          | -0.8 (-1.96 – -0.33) | 1.04 (0.99 – 1.09)   | -0.8 (-1.96 – 1.09)  | -0.41 (-2.07 – 0.83) | -0.33 (-2.07 – 1.09) |
| – MPS          | 0.57 (-1.46 – 1.65)  | 0.73 (-1.01 – 2.46)  | 0.58 (-0.77 – 1.66)  | 0.35 (-0.82 – 2.61)  | 0.48 (-1.01 – 2.61)  |
| – VDT          | 0.18 (-1.05 – 1.14)  | -0.82 (-2.55 – 0.91) | 0.01 (-1.7 – 1.14)   | 0.36 (-2.27 – 1.14)  | 0.18 (-2.55 – 1.14)  |
| – PPT          | 0.71 (0.03 – 1.94)   | -0.24 (-1.97 – 1.49) | 1.03 (-2.16 – 2.0)   | 0.29 (-0.83 – 2.61)  | 0.42 (-2.16 – 2.61)  |
| Pleasant touch | 8 (0 – 10)           | 1.5 (-5 – 8)         | 8 (0 – 10)           | 10 (0 – 10)          | 8 (-5 – 10)          |

Data are given as median with range in brackets.

**Abbreviations:** ADS = Allgemeine Depressionsskala; CCM = corneal confocal microscopy; FIQ = Fibromyalgia Impact Questionnaire; CDT = cold detection threshold; CPT = cold pain threshold; GCPS = Graded Chronic Pain Scale; HPT = heat pain threshold; IENFD = intraepidermal nerve fiber density; MDT = mechanical detection threshold; MPS = mechanical pain sensitivity; MPT = mechanical pain threshold; NBD = nerve branching density; NFD = nerve fiber density; NFL = nerve fiber length; NPSI = Neuropathic Pain Symptom Inventory; PCS = Pain Catastrophizing Scale; PHS = paradoxical heat sensation; PPT = pressure pain threshold; QST = Quantitative Sensory Testing; SSS = symptom



severity score; STAI = State-Trait Anxiety Inventory; TSL = thermal sensory limen; VDT = vibration detection threshold; WDT = warm detection threshold; WPI = widespread pain index.
